# Supplementary material for: Isolation and functional characterization of hepatitis B virus-specific T-cell receptors as new tools for experimental and clinical use
Source: PLOS journal article supplement (doi:10.1371/journal.pone.0182936), 2017-08-08
Supplement: S4 (10.1371/journal.pone.0182936.s004) [file journal.pone.0182936.s004]

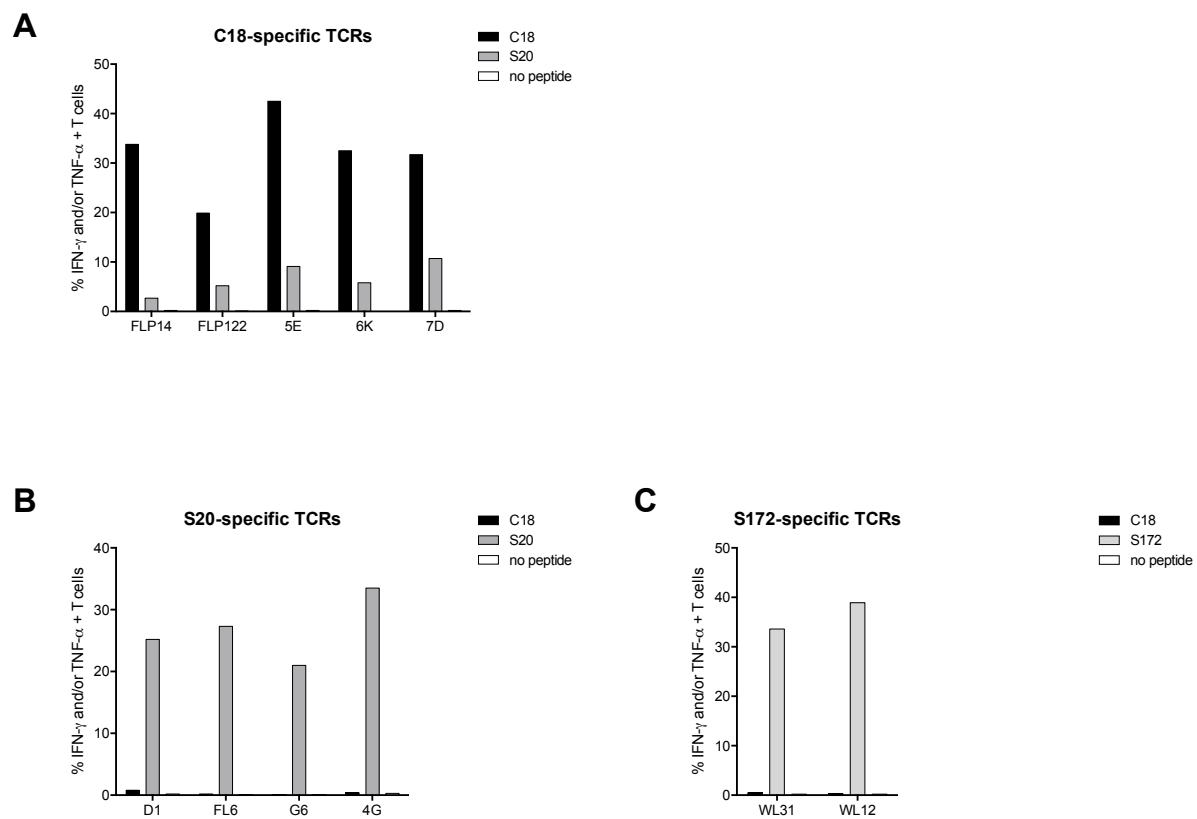

#### S4 Fig. Cross-reactivity of TCR-transduced T cells.

$1 \times 10^5$  T2 cells loaded with  $1 \mu\text{M}$  of C18, S20 or S172 were co-cultured with  $5 \times 10^5$  T cells ( $\text{CD8}^+$  and  $\text{CD4}^+$ ) expressing (A) C18-specific, (B) S20-specific, or (C) S172-specific TCRs. IFN- $\gamma$  and TNF- $\alpha$  single or double positive T cells were detected by intracellular cytokine staining after 5 hours of stimulation at  $37^\circ\text{C}$  and overnight rest at  $4^\circ\text{C}$ . Data are presented as values from single co-cultures.
