# Supplementary material for: Isolation and functional characterization of hepatitis B virus-specific T-cell receptors as new tools for experimental and clinical use
Source: PLOS journal article supplement (doi:10.1371/journal.pone.0182936), 2017-08-08
Supplement: S5 (10.1371/journal.pone.0182936.s005) [file journal.pone.0182936.s005]

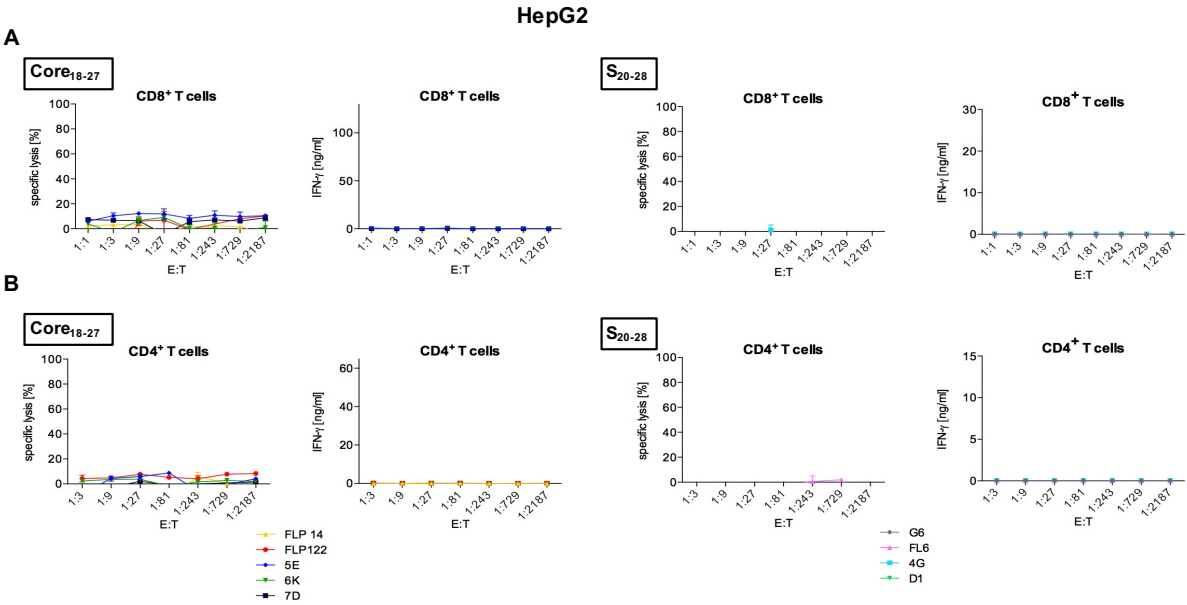

**S5 Fig. Recognition of HBV negative hepatoma cells by TCR-grafted T cells.**

Specific lysis of HBV- HepG2 hepatoma cells or T-cell activation (IFN- $\gamma$  ELISA) by TCR-grafted CD8<sup>+</sup> (A) or CD4<sup>+</sup> (B) T cells was measured. After retroviral transduction CD8<sup>+</sup> and CD4<sup>+</sup> T cells were separated by MACS. The x-axis indicates the decreasing number of effector cells, which was co-cultured with target cells for 72 hours. HepG2 cells are the parental cell line, from which HBV-replicating cells HepG2.2.15 used in Fig 6 were generated. Each color represents one TCR. Data are presented as mean values +/- SEM from triplicate co-cultures.
