# Supplementary material for: Isolation and functional characterization of hepatitis B virus-specific T-cell receptors as new tools for experimental and clinical use
Source: PLOS journal article supplement (doi:10.1371/journal.pone.0182936), 2017-08-08
Supplement: S9 (10.1371/journal.pone.0182936.s009) [file journal.pone.0182936.s009]

|           | TCR<br>Specificity<br>Donor<br>Status           | FLP14                      | FLP122                     | 5E                         | 6K                         | 7D                         | G6                      | FL6                     | 4G                      | D1                      | WL31                      | WL12                      |
|-----------|-------------------------------------------------|----------------------------|----------------------------|----------------------------|----------------------------|----------------------------|-------------------------|-------------------------|-------------------------|-------------------------|---------------------------|---------------------------|
|           |                                                 | Core <sub>18-27</sub><br>2 | Core <sub>18-27</sub><br>2 | Core <sub>18-27</sub><br>1 | Core <sub>18-27</sub><br>1 | Core <sub>18-27</sub><br>1 | S <sub>20-28</sub><br>3 | S <sub>20-28</sub><br>2 | S <sub>20-28</sub><br>1 | S <sub>20-28</sub><br>2 | S <sub>172-180</sub><br>2 | S <sub>172-180</sub><br>1 |
|           |                                                 | acute                      | acute                      | resolved                   | resolved                   | resolved                   | acute                   | acute                   | resolved                | acute                   | acute                     | resolved                  |
| Cell type | Analysis                                        |                            |                            |                            |                            |                            |                         |                         |                         |                         |                           |                           |
| CD8       | % Streptamer+                                   | 79,10                      | 70,30                      | 82,90                      | 67,60                      | 72,90                      | 68,10                   | 73,80                   | 85,30                   | 72,80                   | 73,40                     | 88,10                     |
| CD8       | 1. EC <sub>50</sub> peptide [nM] specific lysis | 0,05                       | 0,20                       | 0,04                       | 0,06                       | 0,04                       | 1,69                    | 0,57                    | 0,34                    | 0,75                    | 1,34                      | 0,70                      |
| CD8       | 2. peptide [nM] cytokine secretion              | 0,005                      | 0,004                      | 0,003                      | 0,019                      | 0,005                      | 0,117                   | 0,038                   | 0,032                   | 0,026                   | 4,370                     | 10,200                    |
| CD8       | 3. E:T <sub>50</sub> specific lysis             | 1:14                       | 1:10                       | 1:20                       | 1:12                       | 1:18                       | 1:4                     | 1:8                     | 1:16                    | 1:19                    | n.d.                      | n.d.                      |
| CD8       | 4. E:T IFN-γ secretion                          | 1:215                      | 1:80                       | 1:158                      | 1:290                      | 1:81                       | 1:22                    | 1:45                    | 1:56                    | 1:26                    | n.d.                      | n.d.                      |
| CD4       | % Streptamer+                                   | 68,70                      | 39,60                      | 40,00                      | 54,10                      | 16,00                      | 26,00                   | 3,20                    | 70,00                   | 43,40                   | 2,52                      | 64,20                     |
| CD4       | 1. EC <sub>50</sub> peptide [nM] specific lysis | 0,68                       | n.d.                       | 0,23                       | 0,12                       | 0,49                       | 2924,00                 | 25,07                   | 0,79                    | 4,07                    | 7264,00                   | 1,26                      |
| CD4       | 2. peptide [nM] cytokine secretion              | 0,40                       | n.d.                       | 0,08                       | 0,01                       | 0,07                       | 108,30                  | 0,58                    | 0,11                    | 3,16                    | n.d.                      | 0,47                      |
| CD4       | 3. E:T <sub>50</sub> specific lysis             | n.d.                       | n.d.                       | 1:21                       | 1:19                       | 1:8                        | n.d.                    | n.d.                    | n.d.                    | n.d.                    | n.d.                      | n.d.                      |
| CD4       | 4. E:T IFN-γ secretion                          | n.d.                       | n.d.                       | 1:12                       | 1:124                      | 1:5                        | n.d.                    | n.d.                    | 5,2                     | n.d.                    | n.d.                      | n.d.                      |
| CD3       | # of HLA-A*02 subtypes recognized               | 10                         | 8                          | 10                         | 7                          | 8                          | 5                       | 4                       | 8                       | 5                       | 8                         | 7                         |
|           | Score                                           | 20                         | 13                         | 32                         | 33                         | 26                         | 12                      | 18                      | 31                      | 20                      | 12                        | 18                        |

|                    |       |
|--------------------|-------|
| color code:        | Score |
| superior           | 4     |
| good               | 3     |
| intermediate       | 2     |
| bad                | 1     |
| n.d.= not detected | 0     |

Streptamer staining was not included in the scoring, because it does not have any implication for using a TCR in T cell therapy

**S3 Table. Summary of TCR comparison.** This table summarizes the actual values that were measured for each TCR in the different assays for comparing the functionality of the T-cell receptors. For each assay there was a score, grading the performance of a TCR compared to other TCRs. The lower the peptide concentration or the E:T ratio needed to achieve specific lysis or cytokine secretion, the more sensitive is the respective TCR. Assay 1: Peptide concentration needed to kill 50% of peptide-loaded T2 target cells, measured by chromium release assay (see Fig 4). Assay 2: Peptide concentration needed to induce cytokine secretion in at least 10% of TCR<sup>+</sup> T cells, measured by ICS (see Fig 3). Assay 3: E:T ratio needed to kill 50% of HBV<sup>+</sup> hepatoma cells, measured by XTT assay (see Fig 6). Assay 4: E:T ratio needed to induce secretion of 5 ng/ml of IFN- $\gamma$  measured by ELISA (see Fig 6).
